- 1 i. **Title:** Elevated maximum temperatures and high-magnitude thermal variability drive  
2 low coral diversity on nearshore lagoonal reefs in Belize  
3 ii. Baumann JH<sup>1\*</sup>, Townsend JE<sup>1</sup>, Courtney TA<sup>1,2,3</sup>, Aichelman HE<sup>1</sup>, Davies SW<sup>1,4</sup>,  
4 Lima FP<sup>3</sup>, Castillo KD<sup>1</sup>  
5 iii. <sup>1</sup>University of North Carolina at Chapel Hill, Department of Marine Sciences, 3202  
6 Murray and Venable Halls, Chapel Hill, NC 27599-3300  
7 <sup>2</sup>Scripps Institution of Oceanography, University of California San Diego, 9500  
8 Gilman Dr, La Jolla, CA 92093-0202  
9 <sup>3</sup>CIBIO/InBIO, Centro de Investigacao em Biodiversidade e Recursos Geneticos,  
10 Universidade do Porto, Campus Agrário de Vairão, Portugal  
11 <sup>4</sup>Northeastern University, Department of Marine and Environmental Sciences;  
12 Nahant, MA  
13 iv. **Keywords:** climate change, global stress, local stress, Belize, lagoonal reefs, coral  
14 diversity, coral community structure, Caribbean  
15 v. **Running Head:** Temperature impacts on lagoonal reefs  
16 vi. **Corresponding author:** Justin Baumann, 513-307-1516, [baumannj@live.unc.edu](mailto:baumannj@live.unc.edu)  
17 vii. **Number of words in Abstract: 295**  
18 viii. **Number of words in main body of paper: 5716**  
19 ix. **Number of citations: 50**  
20  
21  
22  
23  
24  
25  
26  
27  
28  
29  
30  
31  
32  
33  
34  
35

36 **ABSTRACT**

37 **Aim** Coral reefs are increasingly threatened by interactions of global and local anthropogenic  
38 stressors, two of the most prominent being rising seawater temperature and nutrient enrichment.  
39 We aim to determine how spatiotemporal variations of environmental stressors across a  
40 reefscape determine which coral species are most successful during this climate change interval.

41 **Location** Belize, Central America

42 **Methods** Thirteen lagoonal reefs on the Belize Barrier Reef System (BBRS) were surveyed to  
43 investigate the influence of temperature and nutrient history on coral community structure across  
44 reefscapes. A novel metric was developed using ultra-high resolution sea surface temperature  
45 (SST) records to classify reefs as enduring low temperature parameters ( $low_{TP}$ ), moderate  
46 temperature parameters ( $mod_{TP}$ ), or extreme temperature parameters ( $ext_{TP}$ ) based on four  
47 thermal parameters known to be important drivers of overall reef health

48 **Results** Coral species richness, abundance, diversity, density, and percent cover were lower at  
49  $ext_{TP}$  sites compared to  $low_{TP}$  and  $mod_{TP}$  sites, but these reef community traits did not differ  
50 between  $low_{TP}$  and  $mod_{TP}$  sites. Coral life history strategy analyses indicated that  $ext_{TP}$  sites were  
51 dominated by hardy stress-tolerant and fast growing weedy coral species, while  $low_{TP}$  and  $mod_{TP}$   
52 sites included competitive, generalist, weedy, and stress-tolerant coral species.

53 **Main Conclusions** Coral community differences between  $ext_{TP}$  and  $low_{TP}/mod_{TP}$  sites were  
54 primarily driven by temperature differences. While the influence of nutrients on reef community  
55 traits was minimal, bulk nutrient concentrations likely affected percent coral cover. Lack of  
56 community scale differences between  $low_{TP}$  and  $mod_{TP}$  sites is likely driven by low-magnitude  
57 thermal variations in these reef locations. Dominance of weedy and stress-tolerant genera at  $ext_{TP}$   
58 sites suggests that corals utilizing these two life history strategies may be better suited to cope  
59 with IPCC projected ocean warming conditions. Our results reveal that temperature is the  
60 primary driver of differences in coral community composition among these distinct reef  
61 environments.

62

63

## 64 INTRODUCTION

65 Coral reefs are threatened globally due to interactions of anthropogenic impacts such as  
66 warming from increasing greenhouse gas emission, excessive agricultural runoff, overfishing,  
67 and habitat destruction (Hughes *et al.*, 2003; Hoegh-Guldberg *et al.*, 2007; Frieler *et al.*, 2013).  
68 Of particular concern are increasing greenhouse gas emissions that are leading to significant  
69 warming of the oceans (Hughes *et al.*, 2003; Donner *et al.*, 2005). This warming trend is  
70 especially troubling in the Caribbean, where rates of warming are higher than in many other  
71 tropical basins (Chollett *et al.*, 2012), and where coral cover has declined up to 80% in recent  
72 decades (Gardner *et al.*, 2003). Elevated sea surface temperature (SST) is the major cause of the  
73 breakdown of essential coral-algal symbiosis, which can ultimately lead to mass coral bleaching  
74 (Jokiel & Coles, 1990; D'Croz *et al.*, 2001) and these bleaching events are projected to increase  
75 in frequency and severity as the climate continues to warm (Donner *et al.*, 2005; Wooldridge *et al.*,  
76 2005). The Caribbean Sea is expected to be severely affected by warming as corals are  
77 extremely sensitive to even small temperature increases of less than 1°C (McWilliams *et al.*,  
78 2005). In fact, the Caribbean is predicted to suffer bleaching events biannually within the next  
79 20-30 years (Donner *et al.*, 2007) with predicted annual bleaching events occurring as soon as  
80 2040 (van Hooidonk *et al.*, 2015). Caribbean-wide and global scale bleaching events are  
81 predicted to continue through the end of the century unless corals can increase their thermal  
82 tolerance at a rate of 0.2-1.0 °C per decade (Donner *et al.*, 2005).

83 Annual or daily thermal variability have recently been identified as important factors in  
84 coral thermal tolerance (Oliver & Palumbi, 2011; Soto *et al.*, 2011; Barshis *et al.*, 2013). Indeed,  
85 previous exposure to thermal variability increases a coral's tolerance to future stress events  
86 (Oliver & Palumbi, 2011; Carilli *et al.*, 2012; Castillo *et al.*, 2012; Pineda *et al.*, 2013), and

87 research suggests that Pacific corals living in areas with a high annual average SST are less  
88 susceptible to bleaching (van Woesik *et al.*, 2012; Fine *et al.*, 2013). A recent study has also  
89 shown that coral from both the mildest and the most extreme thermal environments can escape  
90 mortality during a bleaching event (Pineda *et al.*, 2013). Along the Belize Barrier Reef System  
91 (BBRS), corals historically exposed to less thermal variability exhibited slower growth rates  
92 and/or greater mortality in response to SST increases (Carilli *et al.*, 2012; Castillo *et al.*, 2012).  
93 In the Florida Keys, coral growth rates and cover were found to be higher in nearshore  
94 environments with more variable temperatures than on deeper reefs with more stable  
95 temperatures, in spite of higher nutrient concentrations nearshore (Lirman & Fong, 2007). While  
96 many studies suggest that extreme temperature variability (prolonged summer warming or  
97 extreme daily fluctuation) leads to higher coral resilience (Oliver & Palumbi, 2011; Barshis *et*  
98 *al.*, 2013; Pineda *et al.*, 2013), there is also evidence that corals experiencing moderate long term  
99 temperature variability (either average annual or daily variation) are better able to cope with  
100 stress (Soto *et al.*, 2011).

101 Temperature stress is not the only factor leading to Caribbean coral decline. Nutrient  
102 enrichment also plays a role and can lead directly to reef degradation (Fabricius, 2005; Kline *et*  
103 *al.*, 2006; Wooldridge, 2009; Wiedenmann *et al.*, 2013; DeCarlo *et al.*, 2015). Specifically,  
104 increased dissolved inorganic nitrogen (DIN) has been linked to a reduction of bleaching  
105 thresholds (Wooldridge, 2009; Wiedenmann *et al.*, 2013) and has been shown to increase disease  
106 and bleaching prevalence on Florida reefs (Vega Thurber *et al.*, 2014). Additionally,  
107 macrobioerosion can occur up to 10 times faster in corals in high nitrogen (N) waters compared  
108 to corals in low N waters (DeCarlo *et al.*, 2015). Kline *et al.* (2006) suggested that elevated  
109 levels of N, phosphorous (P), and ammonia did not cause substantial coral mortality in

110 Panamanian corals; instead, elevated levels of dissolved organic carbon (DOC) promoted coral  
111 mortality through acceleration of microbe growth on the surface layer of corals.

112         Although much is known about the influence of temperature and nutrient enrichment on  
113 coral health, it is unclear exactly how these stressors interact to affect coral community structure.  
114 Community differences induced by anthropogenic stressors may lead to circumstances where  
115 reef calcification does not sufficiently counter reef erosion, leading to an overall flattening of  
116 reef structure, decline of coral reefs, and shifts from one dominant coral group to another, or  
117 from coral to algal dominance (Loya *et al.*, 2001; McManus & Polsenberg, 2004; Alvarez-Filip  
118 *et al.*, 2009; Alvarez-Filip *et al.*, 2013). Due to the variety of coral life history strategies and  
119 differential response to stress, an overall decline in coral cover and abundance can also be  
120 coupled with an increase in abundance of certain coral species (Loya *et al.*, 2001; Darling *et al.*,  
121 2012), as seen in the Caribbean with the recent increase in abundance of ‘weedy’ species,  
122 including *Porites astreoides* (Green *et al.*, 2008). Brooding, small, opportunistic corals (weedy)  
123 and fast growing (competitive) corals recover faster from stress events, but are more impacted by  
124 bleaching events than more stress-tolerant, slower growing species (Darling *et al.*, 2012; Darling  
125 *et al.*, 2013). Taken together, this evidence suggests that differential responses between coral  
126 species to temperature and nutrient stressors may lead to community scale shifts in composition.

127         The purpose of the current study was to investigate the influence of temperature and  
128 nutrients on coral community composition of lagoonal reefs across the Belize Barrier Reef  
129 System (BBRS). A novel GIS-based metric was developed to characterize lagoonal reefs across  
130 the BBRS into three thermally distinct regions. Within these three regions, thirteen reef sites  
131 were identified and benthic surveys were conducted to quantify coral community composition.  
132 Quantifying coral community differences amongst these thermally distinct reefs may help predict

133 how coral community structure may respond to climate change. In addition, identifying which  
134 areas and species are best able to cope with stress will allow for more targeted management  
135 strategies and for increased protection of vital reef areas that would otherwise be left  
136 unprotected.

## 137 **MATERIALS AND METHODS**

### 138 **Novel Site Identification**

#### 139 *SST Data Assembly*

140 Daily 1-km horizontal resolution sea surface temperature (SST) data were acquired from  
141 JPL's Multi-Scale High Resolution Sea Surface Temperature (JPL MUR SST) via the Physical  
142 Oceanography Distributed Active Archive Center (PO.DAAC) at the NASA Jet Propulsion  
143 Laboratory, Pasadena, CA (<http://podaac.jpl.nasa.gov>). Conventional 1-km resolution satellite  
144 SST measurements (infrared, IR) are contaminated by clouds, creating data-void areas.  
145 Microwave (MW) data sets can penetrate clouds to gain better temporal coverage, but with a  
146 much coarser spatial resolution (25 km) (Chin *et al.*, 2013). MUR combines these two datasets to  
147 present a more comprehensive and complete SST product. MUR uses the multi-resolution  
148 variational analysis (MRBA) as an interpolation method to combine high resolution datasets with  
149 more conventional datasets, producing a product that contains no cloud contamination (Chin *et*  
150 *al.*, 2013). MUR reports foundation SST, or SST at the base of the diurnal thermocline (~5-10m  
151 depth). Comparison of in-situ temperature (recorded by HOBO® v2 data loggers) and MUR  
152 revealed that MUR showed an average negative bias of  $-0.495 \pm 0.01^\circ\text{C}$  relative to in-situ loggers  
153 (Fig S1). Due to the comprehensive coverage, high resolution, range (2002-2012), and lack of  
154 contamination in this dataset, it was ideal for use in the current study.

155

## 156 *Site Classification*

157 Multiple thermal parameters were calculated at different temporal resolutions and examined  
158 across the thirteen reef sites. In the end, four parameters produced distinct thermal environments  
159 across the BBRS: average annual maximum temperature (Fig S2A in Supporting Information),  
160 average annual temperature range (Fig S2B), average annual number of days above the regional  
161 bleaching threshold of 29.7°C (Aronson *et al.*, 2002) (Fig S2C), and average annual consecutive  
162 days above the regional bleaching threshold (i.e., longest potential thermal stress events) (Fig  
163 S2D). A metric that combined all four thermal parameters was generated using ArcGIS<sup>®</sup> in order  
164 to assess thermal environments across the BBRS. Data from each of the four parameters in the  
165 metric were divided into 8-10 bins (0.5 standard deviations (SD) of the mean) and overlaid on a  
166 map of the BBRS (Table 1). Reefs were not present in areas where the value of any single  
167 variable was <1 SD below or >2 SD above the mean (across the entire data set from 2002-2012).  
168 For all four parameters, areas that were classified in bins  $\geq 1$  SD above the mean were designated  
169 extreme temperature parameter ( $ext_{TP}$ ) sites (Fig.1A). Moderate temperature parameter ( $mod_{TP}$ )  
170 sites were classified as areas where all values were 0.5 to 1 SD above the average annual  
171 temperature range and average annual maximum temperature and within 1 SD of the average  
172 annual consecutive days and average annual number of days above the regional bleaching  
173 threshold (Fig 1A). Low temperature parameter ( $low_{TP}$ ) sites were classified as bins that were 0.5  
174 SD above the average to 2 SD below the average for annual temperature range and annual  
175 maximum temperature and below the average for consecutive and annual days above the  
176 regional bleaching threshold (Fig 1A). Using the metric presented in Fig 1A, 15 sites were  
177 selected. 13 of these sites were visited and surveyed in November 2014 (2 sites were not  
178 surveyed as no corals were located inside of the marked geographic area) (Table 1, Fig 1A).

179 **Benthic surveys**

180 In November 2014, benthic surveys we performed at the 13 sites described above. A team of  
181 three divers surveyed a total of 6 transects at each site following AGRRA methodology  
182 (AGRRA 2003). Genus and species of each coral was identified and the number and size of  
183 individual colonies of each species was recorded on underwater data sheets. After these data  
184 were collected, species diversity, abundance, species richness, and coral life history (following  
185 Darling *et al.*, 2012) were calculated for each site.

186 Six video transects (1 m x 20 m) were also performed at each site using GoPro® cameras  
187 attached to PVC stabilizing apparatuses allowing each diver to stabilize the camera while  
188 performing transects. Video transects were analyzed at UNC in a manner similar to the AGRRA  
189 method used in the field, except two additional parameters (percent coral cover and coral  
190 density) were calculated. Full details and a comparison of the methods employed are available in  
191 Appendix 1 of Supplementary Information.

192 **Nutrient analysis**

193 *Chlorophyll a*

194 Eight-day composite 4-km horizontal resolution chlorophyll a (*chl a*) measurements were  
195 obtained from NASA's Moderate Resolution Imaging Spectroradiometer (AQUA MODIS) via  
196 NOAA's Environmental Research Division's Data Access Program (ERDDAP) (Simons, 2011).  
197 Eight-day composite data were selected in order to minimize gaps in data from cloud cover.  
198 Unlike the MUR SST data used for temperature calculations, there is no integrated, high-  
199 resolution product for *chl a*. Similar to temperature calculations, monthly and yearly average *chl*  
200 *a* values were calculated for each survey site (Fig 1B, 2C). *Chl a* is a widely used proxy for both  
201 primary productivity and nutrient content in seawater (Bell, 1992), as it is the main



202 photosynthetic pigment present in phytoplankton (which can often quickly deplete nutrient  
203 concentrations below detectable limits). It has been shown that remotely sensed data, such as *chl*  
204 *a* concentration, yields better metrics for water quality than traditional measures such as distance  
205 from shore and distance from the nearest river (Polónia *et al.*, 2015). Here, *chl a* data are used as  
206 a proxy for bulk nutrient content across the BBRS. In addition to this reef scale coarse estimate  
207 of bulk nutrients, fine-scale in-situ nutrient sampling was conducted.

208

### 209 *In-situ nutrient sampling*

210 125ml water samples (n=3-10) were filtered and collected in acid washed bottles from each  
211 survey site (n=13), flash frozen on dry ice, and transported to UNC for analysis. Fine-scale  
212 nutrient dynamics were quantified from dissolved inorganic nitrogen [(DIN) = nitrate plus nitrite  
213 (NO<sub>x</sub>) and ammonium (NH<sub>4</sub>)] and dissolved organic carbon (DOC). See Appendix 2 of the  
214 supplementary information for measurement and instrumentation details.

215

### 216 **Statistical Analysis**

217 Standard deviations used for temperature bins and site classification were calculated in  
218 ArcGIS<sup>®</sup>. All other statistical analysis were carried out in R 3.2.2 (R Core Team, 2014).  
219 Transect averaged survey data for species richness, abundance, Shannon diversity, coral cover,  
220 coral density, DIN, DON, DOC, and log-transformed *chl a* data were analyzed using analyses of  
221 variance (ANOVA). Three fixed factors were included in the ANOVA (survey method, site, and  
222 site type) for species richness, abundance, Shannon diversity, DIN, DON, and DOC. Only two  
223 fixed factors (site and site type) were included in the ANOVA for coral cover and coral density,  
224 since only data from video surveys were used to calculate these averages, and also for *chl a*

225 concentrations since they were calculated using satellite measurements and survey type did not  
226 factor in.

227 If factors were significant ( $p < 0.05$ ), a post-hoc Tukey's HSD test was used to evaluate the  
228 significance of each pair-wise comparison. To visualize coral community differences between  
229 site types non-metric multidimensional scaling (NMDS) ordination was implemented using  
230 Bray-Curtis similarity coefficients in the vegan package in R (Oksanen *et al.*, 2013). An optimal  
231 stress test was performed to determine the optimal k value ( $k=20$ ). Resulting NMDS scores were  
232 visualized in two-dimensional ordination space. A PERMANOVA test was performed to analyze  
233 the site type differences using the *adonis* function in the vegan package in R (Oksanen *et al.*,  
234 2013).

235 Linear mixed effects models with random intercepts, random slopes, or random slopes and  
236 random intercepts were created using the nlme package in R (Pinheiro *et al.*, 2007), and were  
237 used to analyze the effects of site type and temperature parameters on ecological measurements  
238 (species richness, abundance, Shannon diversity, coral cover, and coral density). The model that  
239 best described the effect of site type or each temperature parameter on each ecological parameter  
240 was chosen based on the Akaike Information Criterion (AIC), which scales estimated differences  
241 between the model equation and the actual equation (Burnham & Anderson, 2002). This criterion  
242 is based on goodness of fit of the data as well as a correction term that increases the AIC value as  
243 number of predictors increases, which optimizes the model with the lowest AIC for both fit and  
244 simplicity (Burnham & Anderson, 2002). Once the best fitting model was chosen using best AIC  
245 procedure for each ecological parameter vs. temperature parameter across site types, marginal  $R^2$   
246 ( $R^2_m$ ) and conditional  $R^2$  ( $R^2_c$ ) were calculated using the *r.squaredGLMM* function of the  
247 MuMIn package in R (Nakagawa & Schielzeth, 2013). Marginal  $R^2$  describes the proportion of

248 variance explained by fixed factors alone, while the conditional  $R^2$  describes the variance  
249 explained by both random and fixed factors (Nakagawa & Schielzeth, 2013).

250 Linear models tested for the influence of temperature and nutrient parameters on the  
251 variation observed along NMDS1 and NMDS2 (within and between site type community  
252 variation) using the *lm* function in R (R Core Team, 2014).  $R^2$  and *p* values were calculated for  
253 each parameter based on each linear model (Table S11.) For NMDS1, data were also divided by  
254 site type in order to assess within site type variation (Table S9).

255

## 256 **RESULTS**

### 257 **Coral Community Composition**

258 Combined results of AGRRA diver surveys and GoPro<sup>®</sup> video surveys of all 13 sites  
259 revealed that coral species richness varied as a function of site location as well as site type  
260 ( $low_{TP}$ ,  $mod_{TP}$ , or  $ext_{TP}$ ) (Table 3A). Coral species richness was significantly lower at  $ext_{TP}$  sites  
261 compared to  $low_{TP}$  and  $mod_{TP}$  sites, but was not significantly different between  $low_{TP}$  and  $mod_{TP}$   
262 sites (Table 3B, Fig 3A). Coral abundance, Shannon diversity, percent coral cover, and coral  
263 density also followed these same trends (Table 3A, 3B; Fig S3 in Supporting Information).  
264 Nonmetric multidimensional scaling (NMDS) analysis showed the same patterns. Community  
265 structure was significantly different (stress=0.018, adonis test *p* value=0.006) between  $ext_{TP}$  sites  
266 and  $low_{TP}/mod_{TP}$  sites along the NMDS2 axis, but was not different between  $low_{TP}$  and  $mod_{TP}$   
267 sites (Fig 3B).

268 Linear modeling of temperature and nutrient parameters against NMDS1 and NMDS2  
269 revealed that average annual maximum temperature, average annual temperature range, average  
270 annual days above the bleaching threshold, average annual consecutive days above the bleaching

271 threshold, DOC, and DON all had significant effects on the NMDS1 variation and all four  
272 temperature parameters, as well as DON and *chl a*, also had significant effects on NMDS2  
273 variation (S11; Fig S6). The parameter that explained the most variation for NMDS1 was DON  
274 ( $R^2=0.3414$ ,  $p \text{ value}=1.18 \times 10^{-15}$ ) and average annual consecutive days above the bleaching  
275 threshold explained the most variation in NMDS2 ( $R^2=0.6039$ ,  $p \text{ value}= 2 \times 10^{-16}$ , S11; Fig S6).

276 Linear regressions of temperature and nutrients parameters within site types along NMDS1  
277 revealed significant effects ( $p < 0.05$ ) of average annual maximum temperature, average annual  
278 days above the bleaching threshold, average annual consecutive days above the bleaching  
279 threshold, DOC, DIN, and DON for all site types, average annual temperature range for mod<sub>TP</sub>  
280 and ext<sub>TP</sub> sites, and *chl a* for ext<sub>TP</sub> sites only (Table S9; Fig S5). Average annual days above the  
281 bleaching threshold yielded the highest  $R^2$  for low<sub>TP</sub> and mod<sub>TP</sub> sites, while average annual  
282 temperature range yielded the highest  $R^2$  for ext<sub>TP</sub> sites (Table S9; Fig S5).

283 Linear mixed effects models of ecological parameters for species richness, abundance,  
284 Shannon diversity, coral cover, and coral density by site type reveal that random intercepts  
285 models best fit the trends in species richness, abundance, Shannon diversity, and coral cover the  
286 best (best AIC), while a random slopes and intercepts model works best for coral density (Table  
287 S10A). Models with the best AIC showed no significant difference between low<sub>TP</sub> and mod<sub>TP</sub>  
288 sites for any parameters, but a significant difference between low<sub>TP</sub> and ext<sub>TP</sub> sites for species  
289 richness, abundance, Shannon diversity, and coral density (Table S10B).

290 Further linear mixed effects modeling of ecological parameters vs. temperature and nutrient  
291 parameters revealed that variation in species richness and coral density across sites was best  
292 explained by the number of consecutive days above the bleaching threshold per year, while total  
293 days above the bleaching threshold per year best explained the variation in coral abundance and

294 Shannon diversity. Variation in coral cover was best explained by *chl a* concentration (Table S5  
295 in Supporting Information). Each model selected as best AIC (model that explains the variation  
296 the best) had a significant *p* value ( $<0.05$ ) (Table S6 in Supporting Information). A similar  
297 modeling approach completed for transects from low<sub>TP</sub> sites only showed that average annual  
298 temperature range best explains the variation for all five ecological parameters, however *p* values  
299 are only significant for coral cover and coral density (Tables S7, S8 in Supporting Information).

300

### 301 **Coral Life History**

302 Coral life history proportions varied by site and differences were observed between site types  
303 (Table 3A). These trends, while not statistically significant across all sites ( $p=0.055$ ), may still be  
304 ecologically interesting (Table 3A). low<sub>TP</sub> sites and ext<sub>TP</sub> sites had significantly different life  
305 history distributions (Table 3B, Fig 4). mod<sub>TP</sub> sites did not differ significantly from low<sub>TP</sub> or  
306 ext<sub>TP</sub> sites. Overall, these data suggest a decrease in competitive and generalist species at ext<sub>TP</sub>  
307 sites compared to low<sub>TP</sub> and mod<sub>TP</sub> sites (Fig 4).

308

### 309 **Nutrients**

#### 310 *Chlorophyll a*

311 *Chl a* concentrations varied by year and differed by site and site type (Table 2A), but  
312 were consistently lowest at low<sub>TP</sub> sites and highest at ext<sub>TP</sub> sites regardless of year (Table 2B, Fig  
313 2A). 13-year average *chl a* concentrations were significantly different between all three site  
314 types. low<sub>TP</sub> sites had the lowest average *chl a* concentrations, mod<sub>TP</sub> sites had average *chl a*  
315 values significantly higher than low<sub>TP</sub> sites, but significantly lower than ext<sub>TP</sub> sites, and ext<sub>TP</sub>

316 sites had significantly higher average *chl a* values than both low<sub>TP</sub> and mod<sub>TP</sub> sites (Table 2B,  
317 Fig 2B).

318

### 319 *In-Situ Nutrient Concentrations*

320 In-situ values for DIN, DON, Total N, DOC, and C:N varied by site (Table S2, S4).  
321 However, there were no significant differences between site types in terms of average DON and  
322 C:N, while concentrations of DOC and Total N were significantly elevated at ext<sub>TP</sub> sites  
323 compared to low<sub>TP</sub> and mod<sub>TP</sub> sites (Table S3 in Supporting Information, Fig S4A-E in  
324 Supporting Information). DIN concentrations were significantly higher in mod<sub>TP</sub> sites compared  
325 to low<sub>TP</sub> sites, but concentrations at low<sub>TP</sub> and mod<sub>TP</sub> were not significantly different than ext<sub>TP</sub>  
326 sites (Table S3, Fig S4A).

327

## 328 **DISCUSSION**

329 Surveys revealed that ext<sub>TP</sub> sites had lower species richness, abundance, diversity, coral  
330 cover, and coral density than low<sub>TP</sub> and mod<sub>TP</sub> sites, which did not significantly differ from one  
331 another (Fig 3A, 3B, S3). Differences between ext<sub>TP</sub> sites and low<sub>TP</sub>/mod<sub>TP</sub> sites were largely  
332 driven by the temperature parameters used to define the three thermal environments (Table S6,  
333 S11; Fig S6). Ext<sub>TP</sub> sites were dominated by weedy and stress tolerant coral species while corals  
334 of all four life history strategies (Darling *et al.*, 2012) were found at low<sub>TP</sub> and mod<sub>TP</sub> sites (Fig  
335 4). Our data suggest that these coral community differences across site types are likely driven by  
336 temperature parameters and, to a lesser extent, nutrients. Higher bulk nutrient concentrations in  
337 ext<sub>TP</sub> sites may play a role in observed decreased in coral cover (Table S6), while DOC, DON,  
338 and DIN appear to play roles in community differences within, but not among, site types (Table  
339 S11, Fig S5).

## 340 **Coral community composition differed between ext<sub>TP</sub> sites and low<sub>TP</sub>/mod<sub>TP</sub> sites**

341 Coral species richness, abundance, diversity, coral cover, and coral density were all lower  
342 at ext<sub>TP</sub> sites compared to low<sub>TP</sub> and mod<sub>TP</sub> sites, (Fig 3A, S3) suggesting that the coral  
343 community at ext<sub>TP</sub> sites is different from the community at low<sub>TP</sub> and mod<sub>TP</sub> sites. This finding  
344 was further supported by NMDS and linear mixed effects models (Fig 3B, Table S10B) and is  
345 contrary to the results of Soto et al. (2011) which shows that sites with moderate temperature  
346 variability (mod<sub>TP</sub>) have higher coral cover than sites at either extreme and Lirman and Fong  
347 (2007) which showed that nearshore reefs (Ext<sub>TP</sub>) had higher coral cover than offshore reefs in  
348 the Florida Keys. Ext<sub>TP</sub> sites were subjected to higher annual maximum temperatures, more  
349 extreme annual temperature variations, a higher number of days above the bleaching threshold  
350 per year, more consecutive days above the bleaching threshold per year, and higher *chl a*  
351 concentrations than low<sub>TP</sub> and mod<sub>TP</sub> sites. As variation between site types occurred along the  
352 NMDS2 axis (Fig 4), linear modeling of these parameters against NMDS2 revealed that  
353 temperature parameters had a much more significant effect on community differences between  
354 site types than did nutrient parameters (Table S11, Fig 3B). The average annual number of days  
355 above the bleaching threshold ( $R^2=0.5644$ ) and the average annual consecutive days above the  
356 bleaching threshold ( $R^2=0.6039$ ) (S11, Fig S6) were especially important in driving the observed  
357 community differences. Interestingly, these same two temperature parameters best explain the  
358 trends seen in coral species richness, abundance, diversity, and density between site type (Table  
359 S5, S6). This evidence suggests that coral community composition is strongly influenced by time  
360 spent above the regional thermal maximum. *Chl a* concentration was also significant, but  
361 produced an  $R^2=0.0434$  (S11; Fig S6), indicating that while *chl a* may have some impact on  
362 coral community differences between site types; it is unlikely to be a primary driver. Taken

363 together with the fact that other nutrient parameters do not explain a significant proportion of the  
364 variation in NMDS2 (S11; Fig S6), it seems likely that nutrient parameters play a lesser role in  
365 determining overall differences in community structure between these three thermally distinct  
366 site types. Reef flattening may also play a role in decreased species richness between site types  
367 (Newman *et al.*, 2015), however in the current study 3-dimensional reef complexity was not  
368 quantified. Previous research shows that climate change has resulted in increased thermal stress,  
369 declines in coral cover, and shifts in coral community composition (Hughes *et al.*, 2003; Hoegh-  
370 Guldberg *et al.*, 2007). These results suggest that even without causing actual coral bleaching  
371 locally, thermal parameters have a strong influence on coral community composition.

372 In contrast, variation within site types appeared to be dependent upon both temperature  
373 and nutrient parameters and varied based on site type. In low<sub>TP</sub>, mod<sub>TP</sub>, and ext<sub>TP</sub> sites, average  
374 annual days above the bleaching threshold explained the most variation within site types  
375 ( $R^2 > 0.95$ ) (Table S9; Fig S5). Average annual maximum temperature explains 86% of variation  
376 at ext<sub>TP</sub> sites, but only 11% at low<sub>TP</sub> sites (Table S9; Fig S5), indicating that annual maximum  
377 temperature is more of a factor at warmer sites. Average annual consecutive days above the  
378 bleaching threshold showed a similar trend. However, nutrient parameters, such as DIN and  
379 DON appeared to play significant roles within site type variation at mod<sub>TP</sub> and especially ext<sub>TP</sub>  
380 sites (Table S9; Fig S5). Interestingly, linear mixed effects models of ecological parameters  
381 (species richness, abundance, diversity, coral cover, and coral density) among low<sub>TP</sub> sites show  
382 that patterns within all of these parameters were most likely driven by annual temperature range  
383 (Table S7, S8). Overall, within site variation is different based on site type, but both temperature  
384 and nutrient parameters play a role. Variation among sites classified as low<sub>TP</sub> was best explained  
385 by temperature parameters, however at mod<sub>TP</sub> and ext<sub>TP</sub> sites both temperature and nutrient



386 parameters show reasonably high  $R^2$ , suggesting that both play a role in variation within site  
387 type.

388 Interestingly, and in contrast to our results, coral growth and coral cover were found to be  
389 higher in nearshore (ext<sub>TP</sub>-like) environments in the Florida Keys than cooler and less thermally  
390 variable (low<sub>TP</sub>-like) offshore reefs (Lirman & Fong, 2007). This difference may be due to the  
391 fact that corals living in warmer (Williams *et al.*, 2010; van Woosik *et al.*, 2012; Fine *et al.*,  
392 2013) or more variable areas (Oliver & Palumbi, 2011; Barshis *et al.*, 2013) are less susceptible  
393 to bleaching stress due to adaptation/acclimatization to local conditions. However, here we  
394 observe that corals living in ext<sub>TP</sub> environments were not visibly less healthy than corals at low<sub>TP</sub>  
395 and mod<sub>TP</sub> sites (data not shown). In fact, *Siderastrea siderea* in nearshore (ext<sub>TP</sub>) environments  
396 have been shown to have higher growth and calcification rates than those on the forereef (low<sub>TP</sub>)  
397 (Castillo *et al.*, 2011; Carilli *et al.*, 2012; Castillo *et al.*, 2012), suggesting that this species is  
398 locally adapted/acclimatized to more extreme temperature conditions and/or nutrients. These  
399 more extreme conditions may not be suitable for other coral species, which can lead to failed  
400 recruitment or inability of juveniles from more moderate sites to survive in these more extreme  
401 environments due to the influence of thermal history on limiting acclimatization (Howells *et al.*,  
402 2013). Lack of differences in community variables between low<sub>TP</sub> and mod<sub>TP</sub> sites (Fig 3A, S3)  
403 indicates that although reefs subjected to moderate temperature variation have been shown to  
404 have higher coral cover (Soto *et al.*, 2011) differences in temperature and nutrient variables  
405 between these site types (Table 1) may not have been significant enough to elicit a community  
406 level response.

407

408 **Influence of nutrients on coral community composition and life history strategies**

409 Overall, bulk nutrients (*chl a*) increase with increasing temperature parameters, as *chl a* is  
410 highest at ext<sub>TP</sub> sites and lowest at low<sub>TP</sub> sites (Table 2B, Fig 2 A, B). As nutrient concentrations  
411 are highest in ext<sub>TP</sub> environments, it is possible that nutrients are at least partially responsible for  
412 lower species richness, abundance, diversity, cover, and density at extreme sites compared to  
413 low<sub>TP</sub> and mod<sub>TP</sub> sites. In fact, linear mixed effects models show that *chl a* is a better explanatory  
414 variable for the change in percent coral cover across site types than any measured temperature  
415 parameter (Table S4). However, linear modeling of temperature and *chl a* against the NMDS2  
416 axis was used to tease apart the independent contributions of temperature and *chl a* between sites  
417 and revealed that temperature is the primary driver of overall community composition between  
418 site types (Table S11, Fig 3B).

419 Preliminary in-situ nutrient sampling shows that concentrations of DOC and total N are  
420 higher in ext<sub>TP</sub> sites relative to low<sub>TP</sub> and mod<sub>TP</sub> sites (Fig S4C, S4D). It is likely that these two  
421 nutrient types are responsible for driving the increase in bulk nutrients at extreme sites.  
422 Therefore, it is possible that accelerated microbe growth on corals (due to elevated DOC) (Kline  
423 *et al.*, 2006) and/or increased macrobioerosion (correlated with high N) (DeCarlo *et al.*, 2015)  
424 may play a role in lower coral species richness, abundance, diversity, cover, and density at ext<sub>TP</sub>  
425 sites. However, based on linear modeling, it is unlikely that DOC or *chl a* play a large role in  
426 changing coral community ecology between site types (S11, Fig S6). Elevated *chl a*  
427 concentrations at mod<sub>TP</sub> sites compared to low<sub>TP</sub> sites were likely driven by DIN (Fig S4A).  
428 Increased DIN has been shown to cause a reduction in the bleaching threshold and induce a  
429 higher incidence of mortality (Wooldridge, 2009; Vega Thurber *et al.*, 2014). In this case, the  
430 above effect is unlikely to have occurred, as coral community composition did not differ between  
431 these site types. More frequent and consistent seawater nutrient sampling and manipulative

432 experiments are needed to fully understand the impacts of both bulk and individual nutrient pools  
433 on the dynamics of coral communities and individual coral physiology.

#### 434 **Extreme sites are dominated by weedy and stress tolerant coral species**

435 Corals have previously been classified into 4 life history groups (Darling *et al.*, 2012).  
436 Competitive corals are large, quick growing, broadcast spawning, branching and plating species  
437 (i.e. *Acropora cervicornis*). These corals are dominant in ideal conditions and shade out  
438 competitors, but are sensitive to breakage. Weedy corals (i.e. *Porites sp.*) reproduce by brooding,  
439 have small colony sizes, and are opportunistic colonizers of recently disturbed habitat. Stress  
440 tolerant corals (i.e. *Siderastrea siderea*) are slow growing, massive, broadcast spawning species  
441 with long generation times and high fecundity. Generalists (i.e. *Orbicella sp.*) show overlap  
442 between these three groups (Darling *et al.*, 2012). In the current study, ext<sub>TP</sub> sites were  
443 dominated by stress tolerant and weedy genera, while low<sub>TP</sub> sites and mod<sub>TP</sub> sites contained all 4  
444 life history types (Fig 4). Low<sub>TP</sub> sites contained all four life history strategies in mostly equal  
445 proportions, mod<sub>TP</sub> sites were similar but with fewer competitive species than low<sub>TP</sub> sites, and  
446 ext<sub>TP</sub> sites had comparatively fewer of all four life histories, but were dominated by weedy and  
447 stress tolerant genera. Shifts toward weedy and stress tolerant genera under climate change  
448 conditions were predicted by Darling *et al.* (2012) and have been recorded in many areas of the  
449 world, including the Caribbean (Loya *et al.*, 2001; Aronson *et al.*, 2004; Green *et al.*, 2008;  
450 Alvarez-Filip *et al.*, 2011). Even in the face of region-wide decline in coral cover and  
451 competitively dominant species (Gardner *et al.*, 2003), some weedy species, such as *Porites*  
452 *astreoides*, are actually increasing in prevalence in the Caribbean (Green *et al.*, 2008). This  
453 weedy species is likely able to succeed under recent stressors due to its ability to brood and  
454 mature quickly, which allow it to quickly colonize a recently disturbed area. In contrast, stress-

455 tolerant species such as *S. siderea* are likely able to survive in ext<sub>TP</sub> environments due to its slow  
456 growth rates and massive size, which allow them to be resistant to stress. These two contrasting  
457 strategies seem most effective in ext<sub>TP</sub> environments, and are likely to be most effective in future  
458 conditions as the oceans continue to warm.

459

### 460 **Implications for conservation and management of reefs in the face of climate change**

461 Lower coral community diversity and percent cover at ext<sub>TP</sub> sites compared to low<sub>TP</sub> and  
462 mod<sub>TP</sub> sites are likely driven by temperature parameters (particularly the number of days and  
463 number of consecutive days above the bleaching threshold per year, as well as average annual  
464 temperature range and max temperature). While ecological differences between sites may be  
465 mainly driven by temperature parameters, bulk nutrients may still play a role. Lack of  
466 community scale differences between low<sub>TP</sub> and mod<sub>TP</sub> sites suggests that low magnitude  
467 variations in temperature (and nutrient) parameters are less likely to cause measurable,  
468 community-wide changes. The change in community structure between ext<sub>TP</sub> and low<sub>TP</sub>/mod<sub>TP</sub>  
469 sites was accompanied by a change in the dominant coral genera. Low<sub>TP</sub> and mod<sub>TP</sub> sites contain  
470 all 4 coral life histories (competitive, generalist, weedy, and stress-tolerant) (Darling *et al.*,  
471 2012), but ext<sub>TP</sub> sites are dominated almost entirely by weedy and stress-tolerant species,  
472 suggesting that genera utilizing these two life history strategies may be better suited for survival  
473 under more extreme conditions. Future research is needed to examine the relative  
474 acclimatization/adaptation potential of corals at each of these site types as well as the relative  
475 contributions of thermal and nutrient stressors on coral health. Additionally, ext<sub>TP</sub> sites may  
476 warrant further protection as they potentially harbor the coral genera and individuals that are  
477 most likely to thrive as the ocean continues to warm. These sites are not often protected and  
478 should be considered in future conservation management decisions.

479

480 **ACKNOWLEDGEMENTS**

481 This work was supported primarily by a Rufford Small Grant to JHB with secondary support  
482 from start-up funds to KDC. The Department of Defense NDSEG fellowship provided a stipend  
483 for JHB. We thank D. Hoer, L. Speare, and A. Knowlton for laboratory assistance, P. McDaniel  
484 for providing GIS expertise, and C. Berger for assistance with coding. We also thank NASA JPL  
485 for access to MUR SST data used in this paper, NOAA ERDAAP for access to *chl a* and  
486 temperature data, Belize Fisheries Department for issuing permits that has allowed this research  
487 to occur, and Garbutt's Marine for providing local expert guides and boats for field research. The  
488 authors declare that no conflict of interests exists.

489

## 490 REFERENCES

- 491 Alvarez-Filip, L., Carricart-Ganivet, J.P., Horta-Puga, G. & Iglesias-Prieto, R. (2013) Shifts in coral-  
492 assemblage composition do not ensure persistence of reef functionality. *Scientific reports*, **3**
- 493 Alvarez-Filip, L., Dulvy, N.K., Gill, J.A., Côté, I.M. & Watkinson, A.R. (2009) Flattening of Caribbean coral  
494 reefs: region-wide declines in architectural complexity. *Proceedings of the Royal Society of*  
495 *London B: Biological Sciences*, rspb20090339.
- 496 Alvarez-Filip, L., Dulvy, N.K., Côté, I.M., Watkinson, A.R. & Gill, J.A. (2011) Coral identity underpins  
497 architectural complexity on Caribbean reefs. *Ecological Applications*, **21**, 2223-2231.
- 498 Aronson, R., Precht, W., Toscano, M. & Koltes, K. (2002) The 1998 bleaching event and its aftermath on a  
499 coral reef in Belize. *Marine Biology*, **141**, 435-447.
- 500 Aronson, R.B., Macintyre, I.G., Wapnick, C.M. & O'Neill, M.W. (2004) Phase shifts, alternative states, and  
501 the unprecedented convergence of two reef systems. *Ecology*, **85**, 1876-1891.
- 502 Barshis, D.J., Ladner, J.T., Oliver, T.A., Seneca, F.O., Traylor-Knowles, N. & Palumbi, S.R. (2013) Genomic  
503 basis for coral resilience to climate change. *Proceedings of the National Academy of Sciences*,  
504 **110**, 1387-1392.
- 505 Bell, P. (1992) Eutrophication and coral reefs—some examples in the Great Barrier Reef lagoon. *Water*  
506 *Research*, **26**, 553-568.
- 507 Burnham, K.P. & Anderson, D.R. (2002) *Model selection and multimodel inference: a practical*  
508 *information-theoretic approach*. Springer Science & Business Media.
- 509 Carilli, J., Donner, S.D. & Hartmann, A.C. (2012) Historical temperature variability affects coral response  
510 to heat stress. *Plos ONE*, **7**, e34418.
- 511 Castillo, K.D., Ries, J.B. & Weiss, J.M. (2011) Declining coral skeletal extension for forereef colonies of  
512 *Siderastrea siderea* on the Mesoamerican Barrier Reef System, Southern Belize. *Plos ONE*, **6**,  
513 e14615.
- 514 Castillo, K.D., Ries, J.B., Weiss, J.M. & Lima, F.P. (2012) Decline of forereef corals in response to recent  
515 warming linked to history of thermal exposure. *Nature Climate Change*, **2**, 756-760.
- 516 Chin, T.M., Vazquez, J. & Armstrong, E. (2013) A multi-scale, high-resolution analysis of global sea  
517 surface temperature. *Algorithm Theoretical Basis Document, Version*, **1**, 13.
- 518 Chollett, I., Mumby, P.J., Muller-Karger, F.E. & Hu, C.M. (2012) Physical environments of the Caribbean  
519 Sea. *Limnology and Oceanography*, **57**, 1233-1244.
- 520 D'Croz, L., Mate, J.L. & Oke, J.E. (2001) Responses to elevated sea water temperature and UV radiation  
521 in the coral *Porites lobata* from upwelling and non-upwelling environments on the Pacific coast  
522 of Panama. *Bulletin of Marine Science*, **69**, 203-214.
- 523 Darling, E.S., McClanahan, T.R. & Côté, I.M. (2013) Life histories predict coral community disassembly  
524 under multiple stressors. *Global Change Biology*, **19**, 1930-1940.
- 525 Darling, E.S., Alvarez-Filip, L., Oliver, T.A., McClanahan, T.R. & Côté, I.M. (2012) Evaluating life-history  
526 strategies of reef corals from species traits. *Ecology Letters*, **15**, 1378-1386.
- 527 DeCarlo, T.M., Cohen, A.L., Barkley, H.C., Cobban, Q., Young, C., Shamberger, K.E., Brainard, R.E. &  
528 Golbuu, Y. (2015) Coral macrobioerosion is accelerated by ocean acidification and nutrients.  
529 *Geology*, **43**, 7-10.
- 530 Donner, S.D., Knutson, T.R. & Oppenheimer, M. (2007) Model-based assessment of the role of human-  
531 induced climate change in the 2005 Caribbean coral bleaching event. *Proceedings of the*  
532 *National Academy of Sciences of the United States of America*, **104**, 5483-5488.
- 533 Donner, S.D., Skirving, W.J., Little, C.M., Oppenheimer, M. & Hoegh-Guldberg, O. (2005) Global  
534 assessment of coral bleaching and required rates of adaptation under climate change. *Global*  
535 *Change Biology*, **11**, 2251-2265.

- 536 Fabricius, K.E. (2005) Effects of terrestrial runoff on the ecology of corals and coral reefs: review and  
537 synthesis. *Marine Pollution Bulletin*, **50**, 125-146.
- 538 Fine, M., Gildor, H. & Genin, A. (2013) A coral reef refuge in the Red Sea. *Global Change Biology*, **19**,  
539 3640-3647.
- 540 Frieler, K., Meinshausen, M., Golly, A., Mengel, M., Lebek, K., Donner, S.D. & Hoegh-Guldberg, O. (2013)  
541 Limiting global warming to 2 °C is unlikely to save most coral reefs. *Nature Climate Change*, **3**,  
542 165-170.
- 543 Gardner, T.A., Cote, I.M., Gill, J.A., Grant, A. & Watkinson, A.R. (2003) Long-term region-wide declines in  
544 Caribbean corals. *Science*, **301**, 958-960.
- 545 Green, D., Edmunds, P. & Carpenter, R. (2008) Increasing relative abundance of *Porites astreoides* on  
546 Caribbean reefs mediated by an overall decline in coral cover. *Marine Ecology Progress Series*,  
547 **359**, 1-10.
- 548 Hoegh-Guldberg, O., Mumby, P.J., Hooten, A.J., Steneck, R.S., Greenfield, P., Gomez, E., Harvell, C.D.,  
549 Sale, P.F., Edwards, A.J., Caldeira, K., Knowlton, N., Eakin, C.M., Iglesias-Prieto, R., Muthiga, N.,  
550 Bradbury, R.H., Dubi, A. & Hatziolos, M.E. (2007) Coral Reefs under Rapid Climate Change and  
551 Ocean Acidification. *Science*, **318**, 1737-1742.
- 552 Howells, E.J., Berkelmans, R., van Oppen, M.J., Willis, B.L. & Bay, L.K. (2013) Historical thermal regimes  
553 define limits to coral acclimatization. *Ecology*, **94**, 1078-1088.
- 554 Hughes, T.P., Baird, A.H., Bellwood, D.R., Card, M., Connolly, S.R., Folke, C., Grosberg, R., Hoegh-  
555 Guldberg, O., Jackson, J.B.C., Kleypas, J., Lough, J.M., Marshall, P., Nystrom, M., Palumbi, S.R.,  
556 Pandolfi, J.M., Rosen, B. & Roughgarden, J. (2003) Climate change, human impacts, and the  
557 resilience of coral reefs. *Science*, **301**, 929-933.
- 558 Jokiel, P.L. & Coles, S.L. (1990) Response of Hawaiian and other Indo-Pacific reef corals to elevated  
559 temperature. *Coral Reefs*, **8**, 155-162.
- 560 Kline, D.I., Kuntz, N.M., Breitbart, M., Knowlton, N. & Rohwer, F. (2006) Role of elevated organic carbon  
561 levels and microbial activity in coral mortality. *Marine Ecology Progress Series*, **314**, 119-125.
- 562 Lirman, D. & Fong, P. (2007) Is proximity to land-based sources of coral stressors an appropriate  
563 measure of risk to coral reefs? An example from the Florida Reef Tract. *Marine Pollution*  
564 *Bulletin*, **54**, 779-791.
- 565 Loya, Y., Sakai, K., Yamazato, K., Nakano, Y., Sambali, H. & van Woesik, R. (2001) Coral bleaching: the  
566 winners and the losers. *Ecology Letters*, **4**, 122-131.
- 567 McManus, J.W. & Polsenberg, J.F. (2004) Coral-algal phase shifts on coral reefs: ecological and  
568 environmental aspects. *Progress in Oceanography*, **60**, 263-279.
- 569 McWilliams, J.P., Cote, I.M., Gill, J.A., Sutherland, W.J. & Watkinson, A.R. (2005) Accelerating impacts of  
570 temperature-induced coral bleaching in the Caribbean. *Ecology*, **86**, 2055-2060.
- 571 Nakagawa, S. & Schielzeth, H. (2013) A general and simple method for obtaining R<sup>2</sup> from generalized  
572 linear mixed-effects models. *Methods in Ecology and Evolution*, **4**, 133-142.
- 573 Newman, S.P., Meesters, E.H., Dryden, C.S., Williams, S.M., Sanchez, C., Mumby, P.J. & Polunin, N.V.  
574 (2015) Reef flattening effects on total richness and species responses in the Caribbean. *Journal*  
575 *of Animal Ecology*,
- 576 Oksanen, J., Blanchet, F.G., Kindt, R., Legendre, P., Minchin, P.R., O'Hara, R., Simpson, G.L., Solymos, P.,  
577 Stevens, M. & Wagner, H. (2013) Package 'vegan'. *R Packag ver*, **254**, 20-8.
- 578 Oliver, T.A. & Palumbi, S.R. (2011) Do fluctuating temperature environments elevate coral thermal  
579 tolerance? *Coral Reefs*, **30**, 429-440.
- 580 Pineda, J., Starczak, V., Tarrant, A., Blythe, J., Davis, K., Farrar, T., Berumen, M. & da Silva, J.C.B. (2013)  
581 Two spatial scales in a bleaching event: Corals from the mildest and the most extreme thermal  
582 environments escape mortality. *Limnology and Oceanography*, **58**, 1531-1545.

- 583 Pinheiro, J., Bates, D., DebRoy, S. & Sarkar, D. (2007) Linear and nonlinear mixed effects models. *R*  
584 *package version*, **3**, 57.
- 585 Polónia, A.R.M., Cleary, D.F.R., de Voogd, N.J., Renema, W., Hoeksema, B.W., Martins, A. & Gomes,  
586 N.C.M. (2015) Habitat and water quality variables as predictors of community composition in an  
587 Indonesian coral reef: a multi-taxon study in the Spermonde Archipelago. *Science of The Total*  
588 *Environment*, **537**, 139-151.
- 589 Simons, R. (2011) ERDDAP—The Environmental Research Division’s Data Access Program.’. In. Pacific  
590 Grove CA: NOAA/NMFS/SWFSC/ERD
- 591 Soto, I., Muller Karger, F., Hallock, P. & Hu, C. (2011) Sea surface temperature variability in the Florida  
592 Keys and its relationship to coral cover. *Journal of Marine Biology*, **2011**
- 593 Team, R.C. (2014) R: A language and environment for statistical computing. R Foundation for Statistical  
594 Computing, Vienna, Austria, 2012. In. ISBN 3-900051-07-0
- 595 van Hoodonk, R., Maynard, J.A., Liu, Y. & Lee, S.-K. (2015) Downscaled projections of Caribbean coral  
596 bleaching that can inform conservation planning. *Global Change Biology*, n/a-n/a.
- 597 van Woosik, R., Houk, P., Isechal, A.L., Idechong, J.W., Victor, S. & Golbuu, Y. (2012) Climate-change  
598 refugia in the sheltered bays of Palau: analogs of future reefs. *Ecology and Evolution*, **2**, 2474-  
599 2484.
- 600 Vega Thurber, R.L., Burkepile, D.E., Fuchs, C., Shantz, A.A., McMinds, R. & Zaneveld, J.R. (2014) Chronic  
601 nutrient enrichment increases prevalence and severity of coral disease and bleaching. *Global*  
602 *Change Biology*, **20**, 544-554.
- 603 Wiedenmann, J., D’Angelo, C., Smith, E.G., Hunt, A.N., Legiret, F.-E., Postle, A.D. & Achterberg, E.P.  
604 (2013) Nutrient enrichment can increase the susceptibility of reef corals to bleaching. *Nature*  
605 *Climate Change*, **3**, 160-164.
- 606 Williams, G.J., Knapp, I.S., Maragos, J.E. & Davy, S.K. (2010) Modeling patterns of coral bleaching at a  
607 remote Central Pacific atoll. *Marine Pollution Bulletin*, **60**, 1467-1476.
- 608 Wooldridge, S., Done, T., Berkelmans, R., Jones, R. & Marshall, P. (2005) Precursors for resilience in coral  
609 communities in a warming climate: a belief network approach. *Marine Ecology Progress Series*,  
610 **295**, 157-169.
- 611 Wooldridge, S.A. (2009) Water quality and coral bleaching thresholds: Formalising the linkage for the  
612 inshore reefs of the Great Barrier Reef, Australia. *Marine Pollution Bulletin*, **58**, 745-751.

613

614



615 **DATA ACCESSIBILITY**

616 Data will be archived on PANGAEA after acceptance and a DOI will be included here.  
617

618 **BIOSKETCH**

619 Justin Baumann is a PhD student at the University of North Carolina at Chapel Hill working with  
620 Dr. Karl Castillo. His research focuses on the impacts of temperature and nutrients on coral reef  
621 ecosystems and the physiological response of the coral host and endosymbionts to climate  
622 change.

623

624 **Tables**

625 **Table 1: Parameters used in Site Classification**

| <b>Factor</b>                                   | <b>Min</b>     | <b>Mean</b>    | <b>Max</b>    | <b>Standard Deviation</b> | <b>low<sub>TP</sub> Sites</b>           | <b>mod<sub>TP</sub> Sites</b> | <b>ext<sub>TP</sub> Sites</b>          |
|-------------------------------------------------|----------------|----------------|---------------|---------------------------|-----------------------------------------|-------------------------------|----------------------------------------|
| Mean Annual Max Temp                            | 30.192°C       | 30.624°C       | 31.286°C      | 0.273°C                   | 30.192 <sup>1</sup> -<br>30.760<br>°C   | 30.760-<br>30.897 °C          | 30.897-<br>31.286 <sup>2</sup><br>°C   |
| Mean Annual Temp Range                          | 4.35°C         | 5.168°C        | 7.065°C       | 0.692°C                   | 4.350 <sup>3</sup> -<br>5.514 °C        | 5.514-<br>5.860 °C            | 5.860-<br>7.065 <sup>4</sup> °C        |
| Mean Annual Days Above Bleaching Threshold      | 20.000<br>days | 40.105<br>days | 78.4<br>days  | 14.333<br>days            | 20.000 <sup>5</sup> -<br>40.105<br>days | 40.105-<br>54.439<br>days     | 54.439-<br>78.400 <sup>6</sup><br>days |
| Mean Consecutive Days Above Bleaching Threshold | 3.000<br>days  | 4.758<br>days  | 7.500<br>days | 0.921<br>days             | 3.000 <sup>7</sup> -<br>4.750<br>days   | 4.750-<br>5.680<br>days       | 5.680-<br>7.500 <sup>8</sup><br>days   |

626 <sup>1</sup>No corals below 30.352

627 <sup>2</sup>No corals above 31.169

628 <sup>3</sup>No corals below 4.476

629 <sup>4</sup>No corals above 6.552

630 <sup>5</sup>No corals below 25.772

631 <sup>6</sup>No corals above 68.772

632 <sup>7</sup>No corals below 3.837

633 <sup>8</sup>No corals above 6.600

634

635 Table 1: Values for the four factors included in site selection metrics. Values are all averages  
 636 from 2002-2012 and include measurements for minimum, mean, maximum, and standard  
 637 deviation for each factor. The range at which each factor was classified as low<sub>TP</sub>, mod<sub>TP</sub>, or ext<sub>TP</sub>  
 638 site is also shown. Note that these ranges vary for each factor because at both low and high  
 639 extremes coral reefs were not present. Superscripts indicate ranges in which corals are not  
 640 present.

641

642

643

644

645 **Table 2A: Effects of site and site type on 13 year average (2002-2015) *Chl a* concentration**

| Site Variable | df | Sum Sq | Mean Sq | F value | <i>p</i> -value   |
|---------------|----|--------|---------|---------|-------------------|
| Site          | 12 | 1350   | 112.75  | 131.5   | <b>&lt;0.0001</b> |
| Site Type     | 2  | 288    | 144.00  | 166.7   | <b>&lt;0.0001</b> |

646 Table 2A: Results of analysis of variance (ANOVA) of the effect of site and site type on *chl a*.

647 Significant effects are in bold ( $p < 0.05$ ). df= degrees of freedom.

648

649 **Table 2B: Pair-wise comparisons of effects of site type on 13 year (2002-2015) *Chl a***  
650 **concentration**

| Comparison                           | <i>p</i> -value   |
|--------------------------------------|-------------------|
| low <sub>TP</sub> -mod <sub>TP</sub> | <b>&lt;0.0001</b> |
| low <sub>TP</sub> -ext <sub>TP</sub> | <b>&lt;0.0001</b> |
| mod <sub>TP</sub> -ext <sub>TP</sub> | <b>&lt;0.0001</b> |

651 Table 2B: Results of Tukey's HSD tests evaluating the significance of the pair-wise comparisons  
652 of factors that had a significant effect on *chl a* concentration. Only significant pairwise  
653 comparisons ( $p < 0.05$ ) are included.

654

655

656

657

658

659

660

661

662

663

664

665

666

667

668

669

670 **Table 3A: Effects of Survey Method, Site, and Site Type on Species Richness, Abundance,**  
 671 **Shannon Diversity, Percent Coral Cover, Coral Density, and Life History**

| Community Parameter     | Site Variable | df | Sum sq | Mean sq | F value | p-value           |
|-------------------------|---------------|----|--------|---------|---------|-------------------|
| Species Richness        | Survey Method | 1  | 20.30  | 20.35   | 0.508   | 0.5               |
|                         | Site          | 12 | 918.4  | 76.53   | 15.7    | <b>&lt;0.0001</b> |
|                         | Type          | 2  | 414.9  | 207.4   | 8.41    | <b>0.002</b>      |
| Abundance               | Survey Method | 1  | 16500  | 16500   | 1.37    | 0.3               |
|                         | Site          | 12 | 238500 | 19890   | 3.80    | <b>0.01</b>       |
|                         | Type          | 2  | 116100 | 58010   | 7.06    | <b>0.004</b>      |
| Shannon Diversity Index | Survey Method | 1  | 0.3010 | 0.3012  | 0.786   | 0.4               |
|                         | Site          | 12 | 8.775  | 0.7312  | 13.1    | <b>&lt;0.0001</b> |
|                         | Type          | 2  | 5.274  | 2.637   | 14.4    | <b>&lt;0.0001</b> |
| Percent Coral Cover     | Site          | 12 | 0.5666 | 0.04721 | 15.2    | <b>&lt;0.0001</b> |
|                         | Type          | 2  | 0.1172 | 0.05859 | 6.68    | <b>0.002</b>      |
| Coral Density           | Site          | 12 | 263.5  | 21.96   | 20.7    | <b>&lt;0.0001</b> |
|                         | Type          | 2  | 142.1  | 71.07   | 39.8    | <b>&lt;0.0001</b> |
| Life History            | Site          | 12 | 904.0  | 75.37   | 4.40    | <b>&lt;0.0001</b> |
|                         | Type          | 2  | 4311   | 2156    | 2.92    | 0.06              |

672 Table 3A: Results of three-way analysis of variance (ANOVA) of the effect of site variables on  
 673 coral community parameters. Significant effects are in bold ( $p < 0.05$ ). df= degrees of freedom.

674

675 **Table 3B: Pair-wise comparisons of effects of Site Type on Species Richness, Abundance,**  
 676 **Shannon Diversity, Percent Coral Cover, Coral Density, Life History**

| Community Parameter     | Factor | Comparison                           | p-value           |
|-------------------------|--------|--------------------------------------|-------------------|
| Species Richness        | Type   | low <sub>TP</sub> -ext <sub>TP</sub> | <b>0.003</b>      |
|                         |        | mod <sub>TP</sub> -ext <sub>TP</sub> | <b>0.02</b>       |
| Abundance               | Type   | low <sub>TP</sub> -ext <sub>TP</sub> | <b>0.005</b>      |
|                         |        | mod <sub>TP</sub> -ext <sub>TP</sub> | <b>0.02</b>       |
| Shannon Diversity Index | Type   | low <sub>TP</sub> -ext <sub>TP</sub> | <b>0.001</b>      |
|                         |        | mod <sub>TP</sub> -ext <sub>TP</sub> | <b>0.0001</b>     |
| Percent Coral Cover     | Type   | low <sub>TP</sub> -ext <sub>TP</sub> | <b>0.007</b>      |
|                         |        | mod <sub>TP</sub> -ext <sub>TP</sub> | <b>0.003</b>      |
| Coral Density           | Type   | low <sub>TP</sub> -ext <sub>TP</sub> | <b>&lt;0.0001</b> |
|                         |        | mod <sub>TP</sub> -ext <sub>TP</sub> | <b>&lt;0.001</b>  |
| Life History            | Type   | low <sub>TP</sub> -ext <sub>TP</sub> | <b>0.049</b>      |

677 Table 3B: Results of Tukey's HSD tests evaluating the significance of the pair-wise comparisons  
 678 of factors that had a significant effect on species richness, abundance, Shannon diversity index,  
 679 percent coral cover, coral density, or life history. Only significant pairwise comparisons ( $p < 0.05$ )  
 680 are included.

681

682 **Figure Legends**

683 **Figure 1:** The Belize Barrier Reef System (BBRS) classified by site type (A), and 13 year  
684 average log-transformed [*chl a*] (B). Stars indicate survey and sampling sites. Numbers represent  
685 site labels (see statistical tables below).

686

687 **Figure 2:** Annual (2003-2015) average *chl a* concentration by site type (+/- SE) (A). Panel B  
688 shows overall average *chl a* (D). The letters a, b, and c indicate results of post hoc Tukey tests  
689 that show significant differences between site types ( $p < 0.05$ ).

690

691 **Figure 3:** Species Richness (# of species present) at each site type (A). Statistically significant  
692 differences ( $p < 0.05$ ) are marked with an \*. This trend is consistent among other community  
693 variables, including: coral abundance (# of corals), percent coral cover, Shannon diversity, and  
694 coral density (# of coral/ m<sup>2</sup>) (Fig S2). B.) Nonmetric multidimensional scaling (NMDS) plot of  
695 coral community differences clustered by site type (B).

696

697 **Figure 4:** Abundance of coral ( $\pm 1$  SE) grouped by life history (Darling et al. 2012). Letters a and  
698 b indicate results of post hoc Tukey tests that show significant differences between site types  
699 ( $p < 0.05$ ).

700

701

702

703

704

705

706

707

708

709

710

711

712

713

714 **Figures**

715 **Figure 1: Site location, temperature parameter, and *chl a* maps**

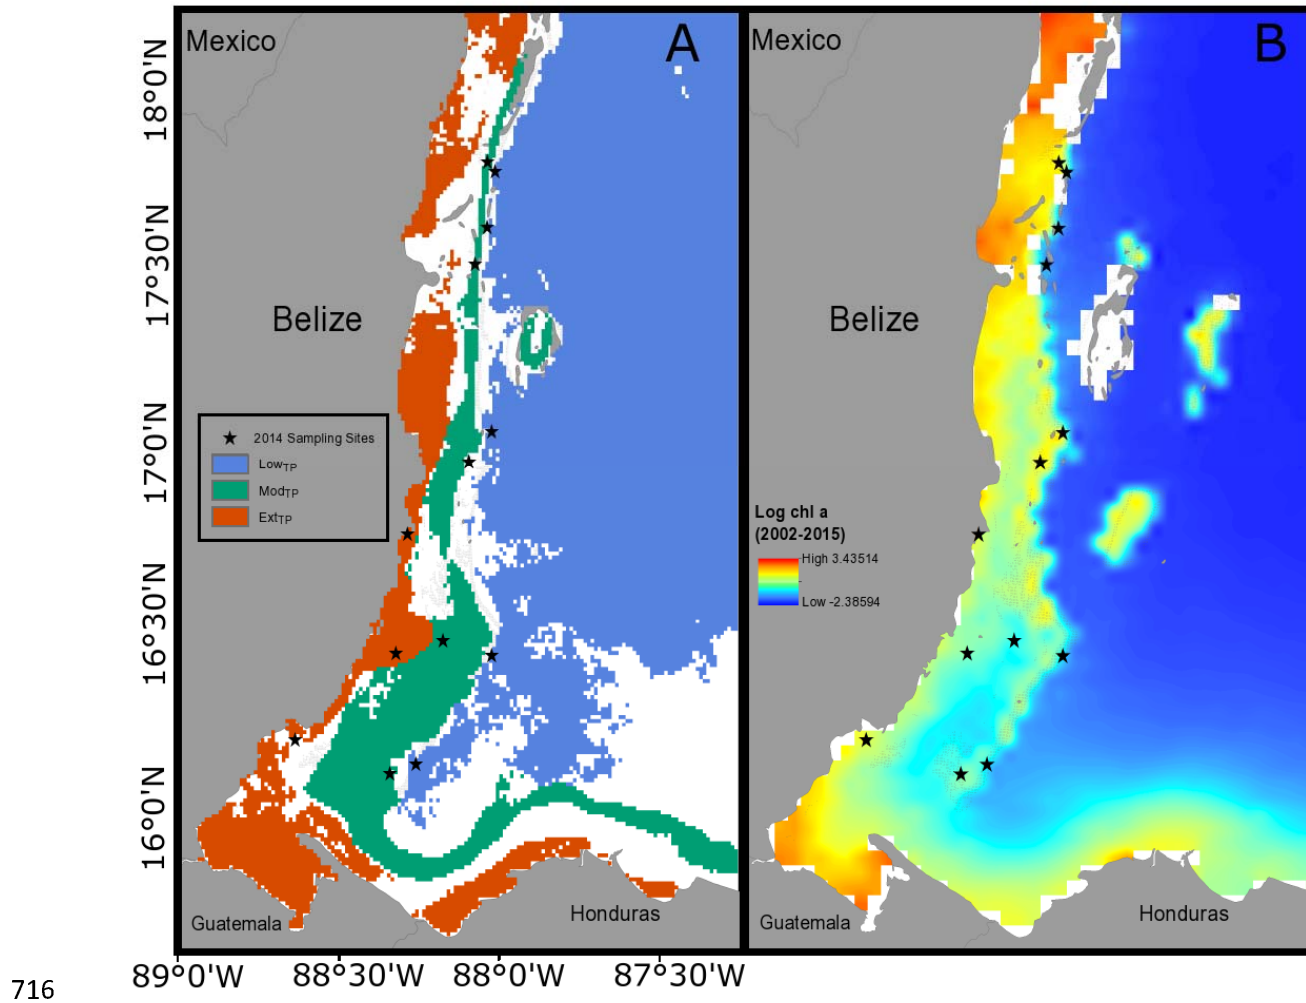

716

717 **Figure 2: Average *chl a* by site type**

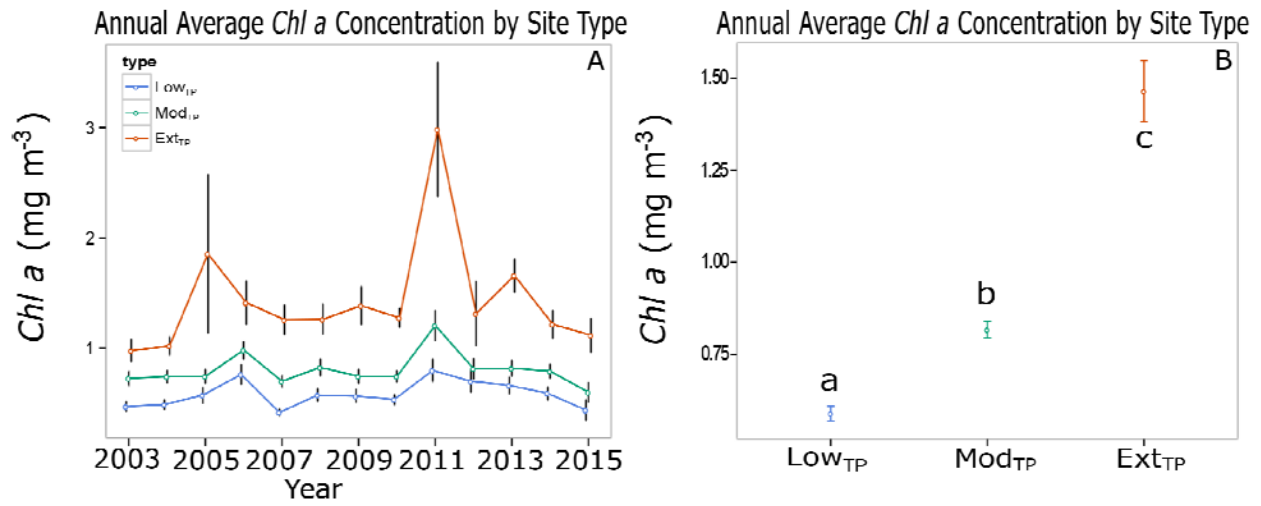

718

719

720

721

722

723

724

725

726

727

728

729

730

731

732

733

734

735

736

737 **Figure 3: A.) Average coral species richness by site type and B.) NMDS of coral community**  
738 **variables by site type**

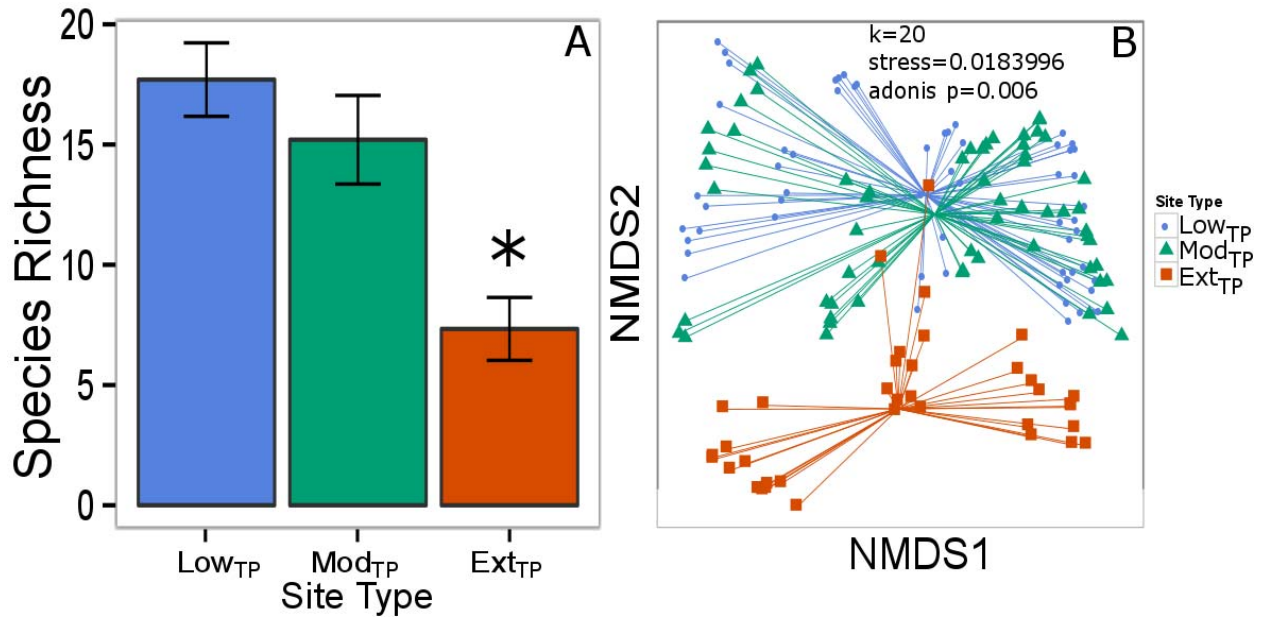

739

740



741 **Figure 4: Coral life history strategy by site type**

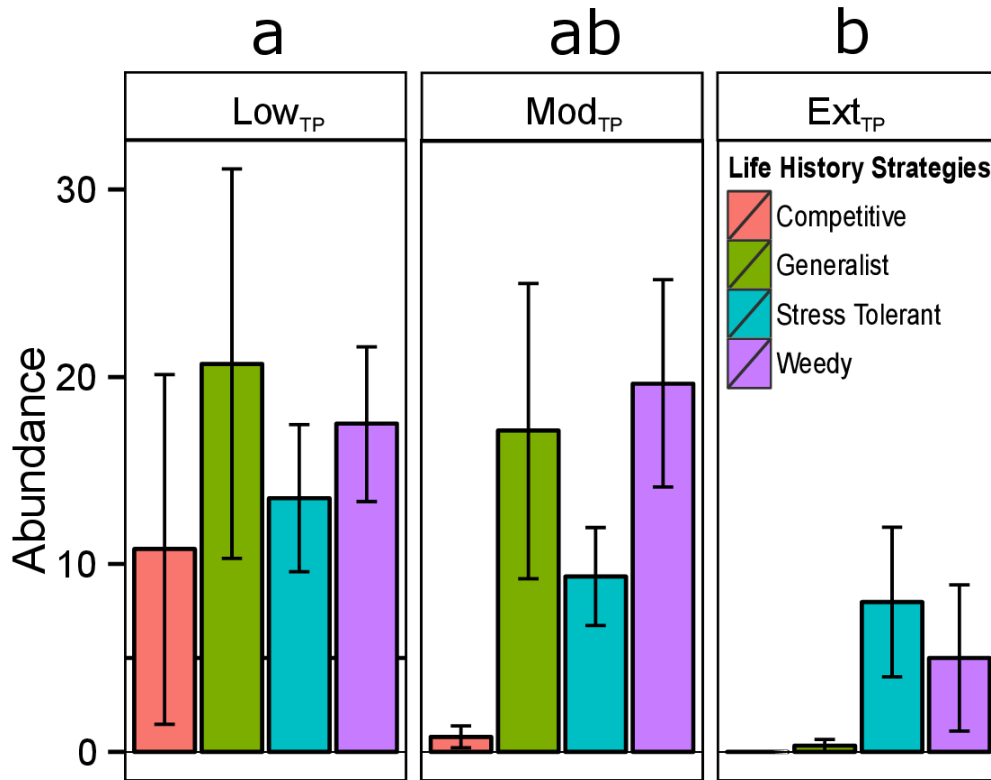

742
